# Supplementary material for: Expression-level optimization of a multi-enzyme pathway in the absence of a high-throughput assay
Source: PubMed Central journal article supplement — Nucleic Acids Res. 2013 Sep 12;41(22):10668–78. doi: 10.1093/nar/gkt809 (PMC3905865; doi:10.1093/nar/gkt809), 2013-09-12
Supplement: supp_gkt809_nar-01790-h-2013-File007.pdf [file supp_gkt809_nar-01790-h-2013-File007.pdf]

## SUPPLEMENTARY INFORMATION

|                          |                                                              |
|--------------------------|--------------------------------------------------------------|
| Supplementary Methods    | Regression model implementation details                      |
| Supplementary Table S1   | List of plasmids used in this study                          |
| Supplementary Table S2   | List of primers used in this study                           |
| Supplementary Table S3   | Sequences of TRAC duplex probes                              |
| Supplementary Table S4   | Recombination rates of tandem expression plasmids            |
| Supplementary Table S5   | “TRAC barcode” results                                       |
| Supplementary Table S6   | Strains with directed flux raw data                          |
| Supplementary Figure S1  | Chromatogram and absorbance spectra of violacein extractions |
| Supplementary Figure S2  | Raw fluorescence data from a typical TRAC reaction plate     |
| Supplementary Figure S3  | Characterization of yeast constitutive promoters             |
| Supplementary Figure S4  | Gibson assembly of multi-gene constructs                     |
| Supplementary Figure S5  | Combinatorial assembly of a fluorescent protein library      |
| Supplementary Figure S6  | TaqMan Rapid Analysis of Combinatorial assemblies            |
| Supplementary Figure S7  | “TRAC barcode” design                                        |
| Supplementary Figure S8  | Chemical structures of the violacein biosynthetic pathway    |
| Supplementary Figure S9  | Violacein biosynthesis expression library                    |
| Supplementary Figure S10 | Effect of training set size on model accuracy                |

## Supplementary Methods. Regression model implementation details

Although we assume independence of each enzyme's contribution, we also posit that the relationship between enzyme expression and product titer is not necessarily monotonic. Therefore, one natural framework for building the model is through the use of categorical variables that represent the presence or absence of a particular promoter in front of each gene. Thus, using a log-linear model (the training data were skewed towards zero, and we found a log transform of the data improved performance), the product titer  $t$  as a function of the promoter-gene combinations is modeled as

$$t = \exp \left( \beta_{00} + \sum_{i \in \{1, \dots, \#E\}} \sum_{j \in \{1, \dots, \#P_i\}} \beta_{ij} x_{ij} \right)$$

where  $\beta_{ij}$  are the unknown coefficients of the model, and  $x_{ij} = 1$  if the  $j$ -th promoter is driving the  $i$ -th gene and 0 otherwise. Because only one promoter can be in front of each gene, the independent variables  $x_{ij}$  are constrained such that  $\sum_{j \in \{1, \dots, \#P_i\}} x_{ij} = 1$  for the  $i$ -th gene. In the case of five genes and five promoters for each gene,  $\#E = 5$  and  $\#P_1 = \#P_2 = \#P_3 = \#P_4 = \#P_5 = 5$ .

For  $N$  experimental measurements, we define the vector of response variable (titer) measurements as

$$T = \begin{bmatrix} t^1 \\ \vdots \\ t^N \end{bmatrix}$$

where the superscript notation  $t^k$  denotes the measurement from the  $k$ -th experiment. Similarly, we define the matrix of promoter combinations as

$$X = \begin{bmatrix} x_{11}^1 & \cdots & x_{\#E\#P_{\#E}}^1 \\ \vdots & \ddots & \vdots \\ x_{11}^N & \cdots & x_{\#E\#P_{\#E}}^N \end{bmatrix}$$

where each row represents the genotype of the  $k$ -th sample. The vector of unknown coefficients is

$$B = \begin{bmatrix} \beta_{11} \\ \vdots \\ \beta_{\#E\#P_{\#E}} \end{bmatrix}$$

Thus, the model can be succinctly represented as  $\log(T) = \beta_{00} + XB$ . Because the logarithm of zero is negative infinity, we set entries of  $T$  that are zero to 0.5, because this is the smallest amount that we can experimentally measure. To train this model, we obtained  $N = 182$  measurements (*i.e.*, ninety-one clones in duplicate).

Identification of the unknown  $\beta_{ij}$  coefficients in the model is challenging because of the high-dimensional nature of the problem. We used the previously described Exterior Derivative Estimator (EDE) method(26) to identify the coefficients of the model because it can better protect against overfitting than traditional methods (for the violacein pathway, using ordinary least squares regression resulted in a model with almost no correlation in the test set: Pearson R-values of -0.01, 0.06, -0.02, and 0.01 for violacein, deoxyviolacein, proviolacein, and prodeoxyviolacein, respectively). EDE protects

against overfitting by learning constraints that the data obeys, and then it uses these constraints to reduce the degrees of freedom in the regression. More specifically, the coefficients estimated by EDE are given by

$$\hat{B} = \arg \min_B \|\log(T) - XB - \beta_{00}\|^2 + \lambda \|PB\|^2$$

where  $P = UU^T$ , and  $U$  is a matrix whose columns are the  $m$  smallest principal components of the covariance matrix  $X^T X$ .  $\lambda$  and  $m$  are tuning parameters that are chosen in a data-driven manner using cross-validation.

In general, the rows of the matrix  $X$  form a manifold, and the projection matrix  $P$  enforces that the regression coefficients lie close to the manifold formed by  $X$ . This methodology is motivated by differential geometry, which says that the exterior derivative of a function on an embedded submanifold lies in the cotangent space(38).

**Supplementary Table S1. List of plasmids used in this study.**

| Plasmid | SynBERC Registry ID | Description                                 | Yeast auxotrophic marker |
|---------|---------------------|---------------------------------------------|--------------------------|
| pJED101 | SBa_000896          | Yeast cloning vector                        | Met15                    |
| pJED102 | SBa_000897          | Yeast cloning vector                        | His3                     |
| pJED103 | SBa_000898          | Yeast cloning vector                        | Leu2                     |
| pJED104 | SBa_000899          | Yeast cloning vector                        | Ura3                     |
| pAH056  | SBa_000900          | <i>pTDH3-RFP-tADH1</i>                      | Leu2                     |
| pAH002  | SBa_000901          | <i>pTEF1-RFP-tADH1</i>                      | Leu2                     |
| pAH007  | SBa_000902          | <i>pRPL18B-RFP-tADH1</i>                    | Leu2                     |
| pSL030  | SBa_000903          | <i>pRNR2-RFP-tADH1</i>                      | Leu2                     |
| pAH005  | SBa_000904          | <i>pREV1-RFP-tADH1</i>                      | Leu2                     |
| pAH003  | SBa_000905          | <i>pRNR1-RFP-tADH1</i>                      | Leu2                     |
| pAH004  | SBa_000906          | <i>pCCW12-RFP-tADH1</i>                     | Leu2                     |
| pAH006  | SBa_000907          | <i>pHTA2-RFP-tADH1</i>                      | Leu2                     |
| pAH008  | SBa_000908          | <i>pPSP2-RFP-tADH1</i>                      | Leu2                     |
| pAH009  | SBa_000909          | <i>pISW2-RFP-tADH1</i>                      | Leu2                     |
| pAH061  | SBa_000910          | <i>pARC18-RFP-tADH1</i>                     | Leu2                     |
| pAH065  | SBa_000911          | <i>pTEF2-RFP-tADH1</i>                      | Leu2                     |
| pML234  | SBa_000912          | <i>pPGK1-RFP-tADH1</i>                      | Leu2                     |
| pML167  | SBa_000913          | GibA- <i>pTDH3-RFP-tADH1</i> -GibB          | Leu2                     |
| pML168  | SBa_000914          | GibB- <i>pTDH3-YFP-tADH1</i> -GibC          | His                      |
| pML159  | SBa_000915          | GibC- <i>pTDH3-CFP-tADH1</i> -GibD          | Ura3                     |
| pML203  | SBa_000916          | GibA-GibD vector                            | Met15                    |
| pML223  | SBa_000917          | GibA-GibD vector (KanR)                     | Ura3                     |
| pML242  | SBa_000891          | GibA- <i>pTDH3-vioA-tADH1</i> -GibC         | Leu2                     |
| pML243  | SBa_000892          | GibC- <i>pTDH3-vioC-tADH1</i> -GibD         | Ura3                     |
| pML244  | SBa_000893          | GibA- <i>pTDH3-vioB-tADH1</i> -GibB         | Leu2                     |
| pML245  | SBa_000894          | GibB- <i>pTDH3-vioD-tADH1</i> -GibC         | His3                     |
| pML246  | SBa_000895          | GibC- <i>pTDH3-vioE-tADH1</i> -GibD         | Ura3                     |
| pML256  | SBa_000918          | <i>vioAC</i> overexpression plasmid         | Met15                    |
| pML258  | SBa_000919          | <i>vioBDE</i> overexpression plasmid (KanR) | Ura3                     |

All plasmids contain a ColE1 *E. coli* replication origin, carry an ampicillin resistance gene (unless otherwise indicated), and contain a CEN6/ARS4 *S. cerevisiae* replication origin. Annotated plasmid sequences can be found at the SynBERC Registry ([registry.synberc.org](http://registry.synberc.org)). Sequences of plasmids not listed in this table (e.g., the series of YFP plasmids) can be determined simply by replacing the appropriate genes or promoters.

**Supplementary Table S2. List of primers used in this study.**

| <b>Primer</b>                  | <b>Sequence</b>                          |
|--------------------------------|------------------------------------------|
| <i>vioA</i> cloning forward    | gcatAGATCTatgaaacattcttccgatat           |
| <i>vioA</i> cloning reverse    | atgcCTCGAGttaGGATCCcgcgggcgatacgctgcaaca |
| <i>vioB</i> cloning forward    | gcatAGATCTatgagcattctggatttccc           |
| <i>vioB</i> cloning reverse    | atgcCTCGAGtcaGGATCCggcctcgcggtcagtttgc   |
| <i>vioC</i> cloning forward    | gcatAGATCTatgaaacgtgcgattatcgt           |
| <i>vioC</i> cloning reverse    | atgcCTCGAGtcaGGATCCattcacgcgaccaatcttgt  |
| <i>vioD</i> cloning forward    | gcatAGATCTatgaagattctggtcattgg           |
| <i>vioD</i> cloning reverse    | atgcCTCGAGtcaGGATCCgcgctgcaaagcataacgca  |
| <i>vioE</i> cloning forward    | gcatAGATCTatggagaaccgtgagccacc           |
| <i>vioE</i> cloning reverse    | atgcCTCGAGtcaGGATCCgcgcttgcccgcaaaaccg   |
| Gibson A amplification forward | ggtacagacactgcgacaac                     |
| Gibson A amplification reverse | gtattgcgacgaattgccacgttgctg              |
| Gibson B amplification forward | gggtcatcacggctcatc                       |
| Gibson B amplification reverse | agctgtgttgacatctggc                      |
| Gibson C amplification forward | ggtgatccgctgactcct                       |
| Gibson C amplification reverse | ggctcacgtcttatttgggc                     |
| Gibson D amplification forward | cacaaggtcagggcactcatgcgac                |
| Gibson D amplification reverse | tgcatcgagttgattgtcgc                     |
| Gibson A TRAC forward          | gccgataattgcagacg                        |
| Gibson B TRAC forward          | ccagatgtcaacacagctac                     |
| Gibson C TRAC forward          | acacactggcttaaggagac                     |
| <i>vioA</i> TRAC reverse       | caatgcagatatcggaagaatg                   |
| <i>vioB</i> TRAC reverse       | aagtggatacgcgggaaatc                     |
| <i>vioC</i> TRAC reverse       | gacgtgcacttcgtagcc                       |
| <i>vioD</i> TRAC reverse       | gtcattcttctccacgatgtca                   |
| <i>vioE</i> TRAC reverse       | tcgggctccaataagagacata                   |

**Supplementary Table S3. Sequences of TRAC duplex probes.**

|                | Dye strand (5'-3')                      | Quencher strand (5'-3')         |
|----------------|-----------------------------------------|---------------------------------|
| <i>pTDH3</i>   | [ 6-FAM ]-ACACAAGGCAATTGACCCACG- ( P )  | TGGGTCAATTGCCTTGTGT- [ IABkFQ ] |
| <i>pTEF1</i>   | [ Cy3 ]-ACAACAGAAAGCGACCACCCAAC- ( P )  | GGTGGTCGCTTTCTGTTGT- [ IABkFQ ] |
| <i>pRPL18B</i> | [ Cy5 . 5 ]-TCACGCCCAAGAAATCAGGC- ( P ) | CTGATTTCTTGGGCGTGA- [ IAbRQSp ] |
| <i>pRNR2</i>   | [ 6-ROXN ]-AAGCACGGGCAGATAGCACC- ( P )  | GCTATCTGCCCCTGCTT- [ IAbRQSp ]  |
| <i>pREV1</i>   | [ Cy5 ]-ATGCCGCGTTCACAGATTCC- ( P )     | CTGTGAACGCGGCAT- [ IAbRQSp ]    |

Dye strands are labeled on their 5' end with a fluorescent dye, indicated in brackets, and on their 3' end with a phosphate (P). Quencher strands are labeled on their 3' end with Iowa Black® FQ or RQ quenchers, indicated in brackets.

**Supplementary Table S4. Recombination rates of tandem expression plasmids.**

| <b>A</b>       | RFP loss | YFP loss | intact |
|----------------|----------|----------|--------|
| <i>pTDH3</i>   | 0        | 0        | 48     |
| <i>pTEF1</i>   | 0        | 1        | 47     |
| <i>pRPL18B</i> | 0        | 0        | 48     |
| <i>pRNR2</i>   | 1        | 0        | 47     |

| <b>B</b>       | RFP loss | YFP loss | intact |
|----------------|----------|----------|--------|
| <i>pTDH3</i>   | 0        | 0        | 48     |
| <i>pTEF1</i>   | 3        | 0        | 45     |
| <i>pRPL18B</i> | 0        | 0        | 48     |
| <i>pRNR2</i>   | 0        | 0        | 48     |

| <b>C</b>       | RFP loss | YFP loss | CFP loss | intact |
|----------------|----------|----------|----------|--------|
| <i>pTDH3</i>   | 1        | 0        | 0        | 47     |
| <i>pTEF1</i>   | 1        | 0        | 0        | 47     |
| <i>pRPL18B</i> | 0        | 0        | 0        | 48     |
| <i>pRNR2</i>   | 0        | 1        | 0        | 47     |

Plasmids containing tandem expression cassettes of RFP and YFP (**A**), YFP and RFP (**B**), or RFP, YFP, and CFP (**C**) were transformed into yeast, and forty-eight colonies were picked for each construct. *pREV1* was omitted due to its low signal over background making it difficult to discern a loss of fluorescence.

Supplementary Table S5. "TRAC barcode" results.

| Barcode | <i>pTDH3</i> | <i>pTEF1</i> | <i>pRPL18B</i> | <i>pRNR2</i> | <i>pREV1</i> |
|---------|--------------|--------------|----------------|--------------|--------------|
| 1       | 327          | 69           | 144            | 97           | 410          |
| 2       | 368          | 78           | 174            | 113          | 176          |
| 3       | 350          | 69           | 189            | 39           | 441          |
| 4       | 346          | 78           | 183            | 38           | 145          |
| 5       | 307          | 69           | 47             | 114          | 456          |
| 6       | 332          | 71           | 51             | 116          | 158          |
| 7       | 351          | 74           | 54             | 37           | 467          |
| 8       | 357          | 77           | 39             | 36           | 144          |
| 9       | 358          | 27           | 188            | 113          | 535          |
| 10      | 358          | 26           | 170            | 113          | 195          |
| 11      | 343          | 24           | 156            | 39           | 416          |
| 12      | 392          | 23           | 151            | 47           | 195          |
| 13      | 330          | 25           | 43             | 98           | 457          |
| 14      | 444          | 21           | 42             | 140          | 188          |
| 15      | 377          | 19           | 43             | 38           | 514          |
| 16      | 302          | 21           | 66             | 34           | 137          |
| 17      | 127          | 64           | 109            | 93           | 464          |
| 18      | 129          | 79           | 186            | 111          | 177          |
| 19      | 122          | 73           | 186            | 50           | 460          |
| 20      | 120          | 86           | 189            | 41           | 190          |
| 21      | 131          | 79           | 31             | 123          | 607          |
| 22      | 128          | 74           | 58             | 124          | 167          |
| 23      | 121          | 71           | 72             | 34           | 488          |
| 24      | 122          | 70           | 49             | 41           | 175          |
| 25      | 123          | 22           | 155            | 95           | 429          |
| 26      | 123          | 21           | 219            | 123          | 147          |
| 27      | 118          | 23           | 150            | 48           | 577          |
| 28      | 124          | 21           | 177            | 42           | 159          |
| 29      | 122          | 24           | 67             | 136          | 565          |
| 30      | 117          | 21           | 45             | 95           | 150          |
| 31      | 127          | 19           | 58             | 36           | 395          |
| 32      | 123          | 18           | 49             | 39           | 149          |

Thirty-two possible barcode sequences were cloned and used as templates for a TRAC reaction. Boxes outlined in red indicate expected positive probe targets; boxes shaded in blue indicate positive signals identified by TRAC. For example, Barcode #4 has sequences complementary to the *pTDH3*, *pTEF1*, and *pRPL18B* probes, but non-complementary to *pRNR2* and *pREV1*, and a corresponding TRAC reaction only had fluorescence for the three complementary probes. TRAC successfully identified all thirty-two unique barcode sequences.



**Supplementary Table S6. Strains with directed flux raw data.**

| <b>Strain</b> | <b>Violacein</b> | <b>Deoxyviolacein</b> | <b>Proviolacein</b> | <b>Prodeoxyviolacein</b> |
|---------------|------------------|-----------------------|---------------------|--------------------------|
| V1            | 141.0 ± 14.5     | 8.1 ± 1.1             | 46.5 ± 8.5          | 8.7 ± 0.4                |
| V2            | 81.5 ± 12.1      | 4.9 ± 0.7             | 41.3 ± 3.0          | 7.0 ± 0.5                |
| V3            | 80.1 ± 8.1       | 4.1 ± 0.2             | 45.0 ± 6.3          | 6.9 ± 0.4                |
| V4            | 25.4 ± 11.4      | 22.2 ± 10.8           | 14.1 ± 5.1          | 25.4 ± 8.6               |
| V5            | 90.5 ± 18.5      | 12.3 ± 1.9            | 34.8 ± 3.3          | 12.5 ± 1.3               |
| DV1           | 25.4 ± 11.4      | 22.2 ± 10.8           | 14.1 ± 5.1          | 25.4 ± 8.6               |
| DV2           | 0 ± 0            | 32.5 ± 23.2           | 0 ± 0               | 38.7 ± 12.8              |
| DV3           | 28.6 ± 4.4       | 35.5 ± 4.4            | 13.7 ± 3.3          | 31.7 ± 5.3               |
| DV4           | 0 ± 0            | 35.6 ± 23.9           | 0 ± 0               | 47.5 ± 14.3              |
| DV5           | 19.4 ± 1.6       | 11.9 ± 1.6            | 17.6 ± 2.3          | 26.2 ± 2.5               |
| PV1           | 4.4 ± 1.7        | 0.8 ± 1.5             | 97.8 ± 5.0          | 11.8 ± 1.2               |
| PV2           | 4.1 ± 2.4        | 1.3 ± 1.5             | 88.0 ± 10.5         | 10.2 ± 0.6               |
| PV3           | 0 ± 0            | 0.7 ± 1.4             | 74.6 ± 6.5          | 11.1 ± 1.5               |
| PV4           | 0 ± 0            | 3.6 ± 0.7             | 106.7 ± 5.6         | 15.0 ± 2.4               |
| PV5           | 6.7 ± 1.4        | 3.1 ± 2.7             | 77.8 ± 52.2         | 6.7 ± 7.7                |
| PDV1          | 0 ± 0            | 0 ± 0                 | 0.9 ± 1.1           | 78.4 ± 34.6              |
| PDV2          | 0 ± 0            | 0 ± 0                 | 0 ± 0               | 79.3 ± 11.4              |
| PDV3          | 0 ± 0            | 0 ± 0                 | 2.3 ± 0.2           | 82.7 ± 2.6               |
| PDV4          | 0 ± 0            | 0.8 ± 1.7             | 1.0 ± 1.2           | 73.2 ± 13.0              |
| PDV5          | 0 ± 0            | 0 ± 0                 | 8.7 ± 1.0           | 94.6 ± 15.9              |

Raw data represented in **Figure 5**. Strains designated V#, DV#, PV#, and PDV# are strains predicted by the model to produce high amounts of violacein, deoxyviolacein, proviolacein, and prodeoxyviolacein, respectively. Values shown are the average titer (as measured by HPLC peak area) of four biological replicates and the standard deviation.

**A**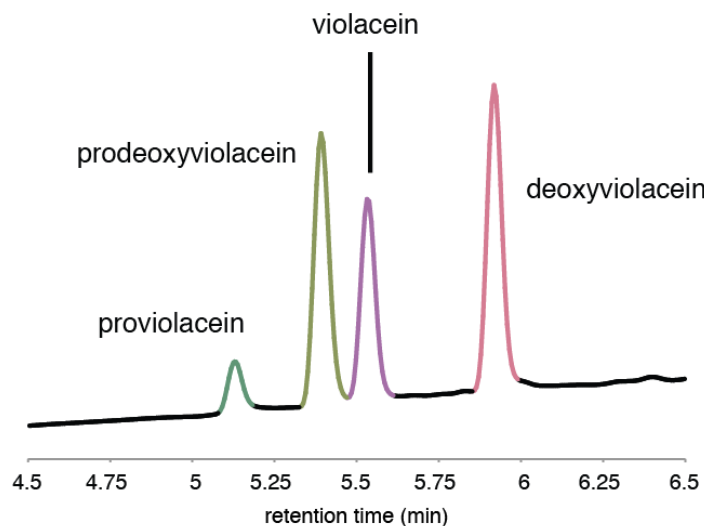**B**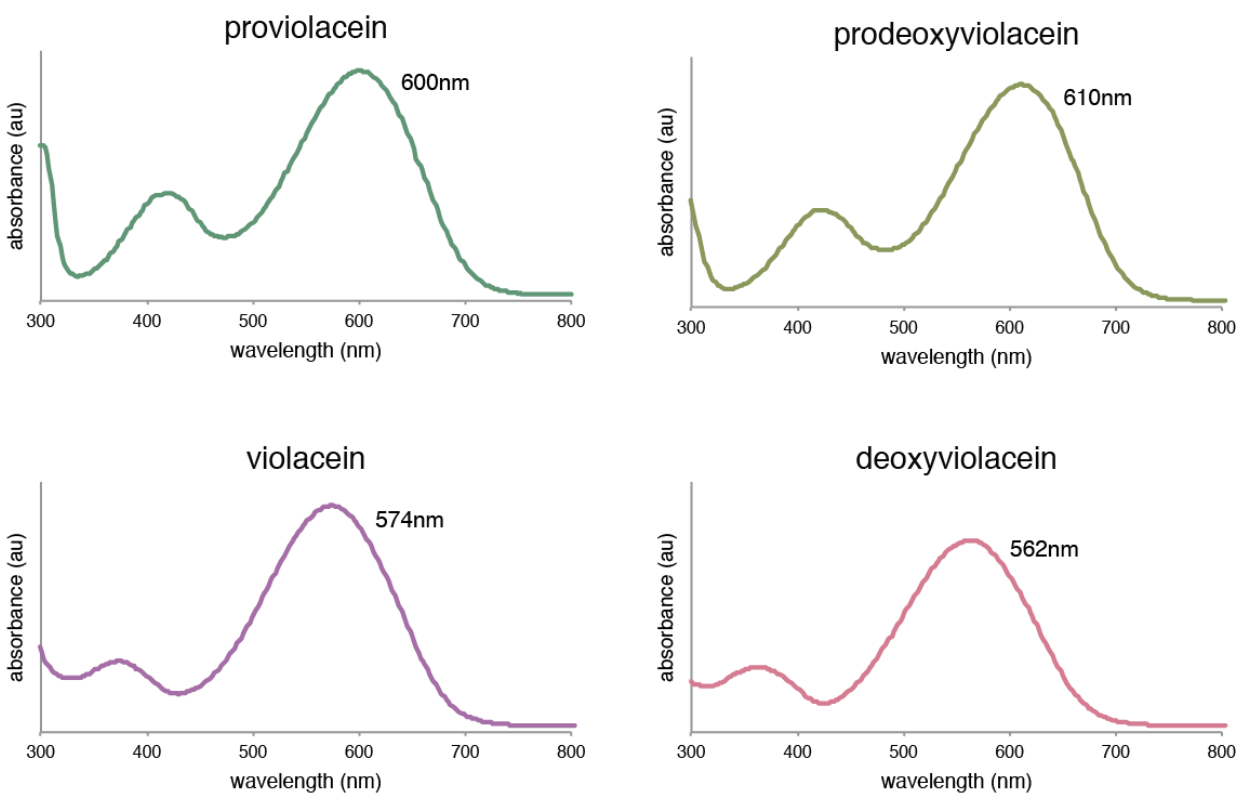

**Supplementary Figure S1. Chromatogram and absorbance spectra of violacein extractions. A.** Chromatogram for absorbance at 565nm. **B.** Absorbance spectra for the four main products. Maximum absorbance wavelength is indicated.

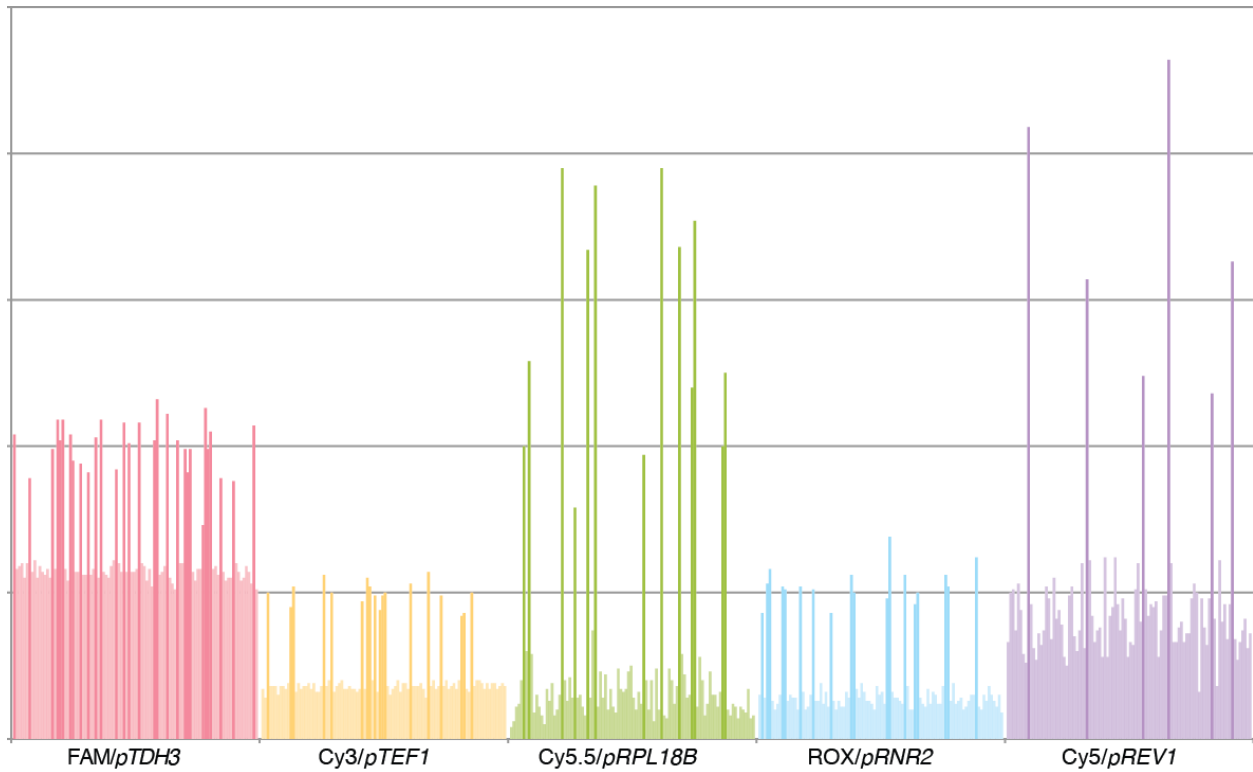

**Supplementary Figure S2. Raw fluorescence data from a typical TRAC reaction plate.** Each promoter is associated with a unique fluorescent dye, which is released and fluoresces after PCR amplification. A set of ninety-six library clones screened is shown, with each of the five wavelengths. Correctly assembled clonal isolates should fluoresce at precisely a single wavelength.

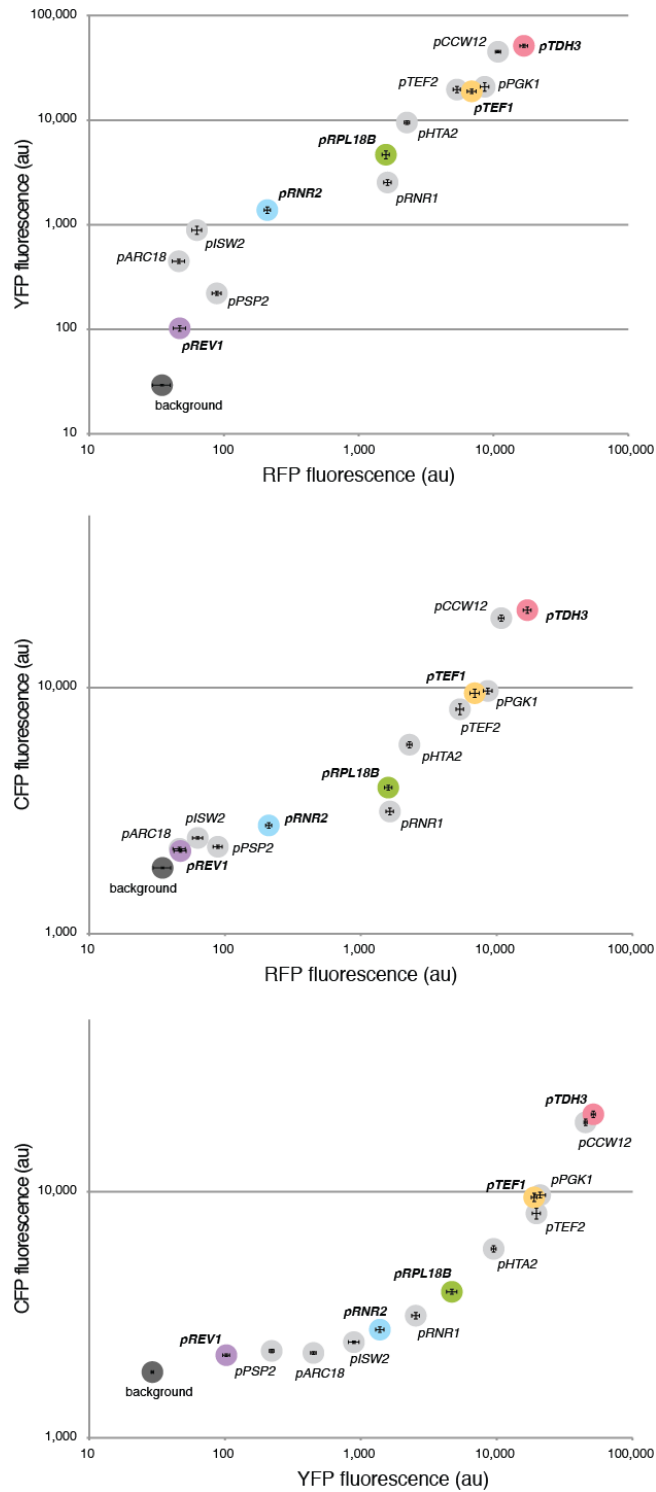

**Supplementary Figure S3. Characterization of yeast constitutive promoters.** Thirteen promoters cloned from the yeast genome driving expression of RFP, YFP, and CFP. The five promoters used in all subsequent experiments are colored. Error bars in all plots indicate s.e.m.  $n=8$ .

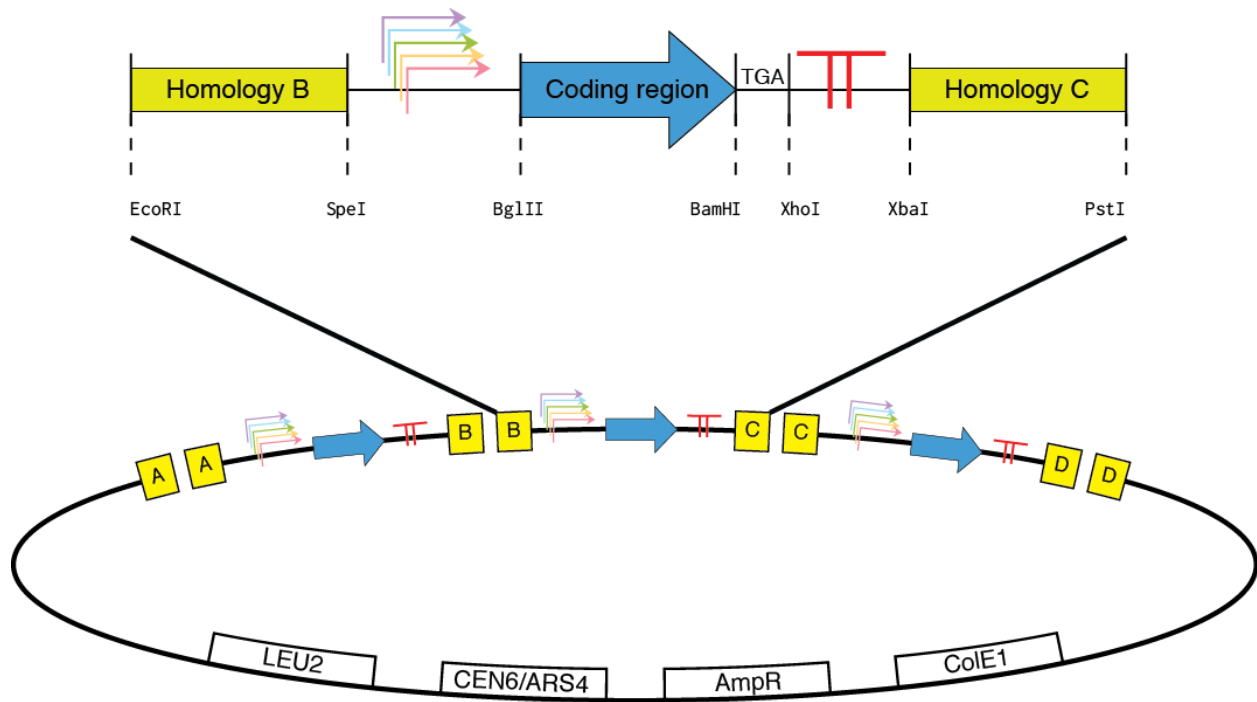

**Supplementary Figure S4. Gibson assembly of multi-gene constructs.** Expression cassettes comprising of a promoter (library), gene, and transcriptional terminator are flanked by unique DNA homology sequences. Homology allows for specific assembly of multiple (shown here, three) cassettes into a recipient vector backbone.

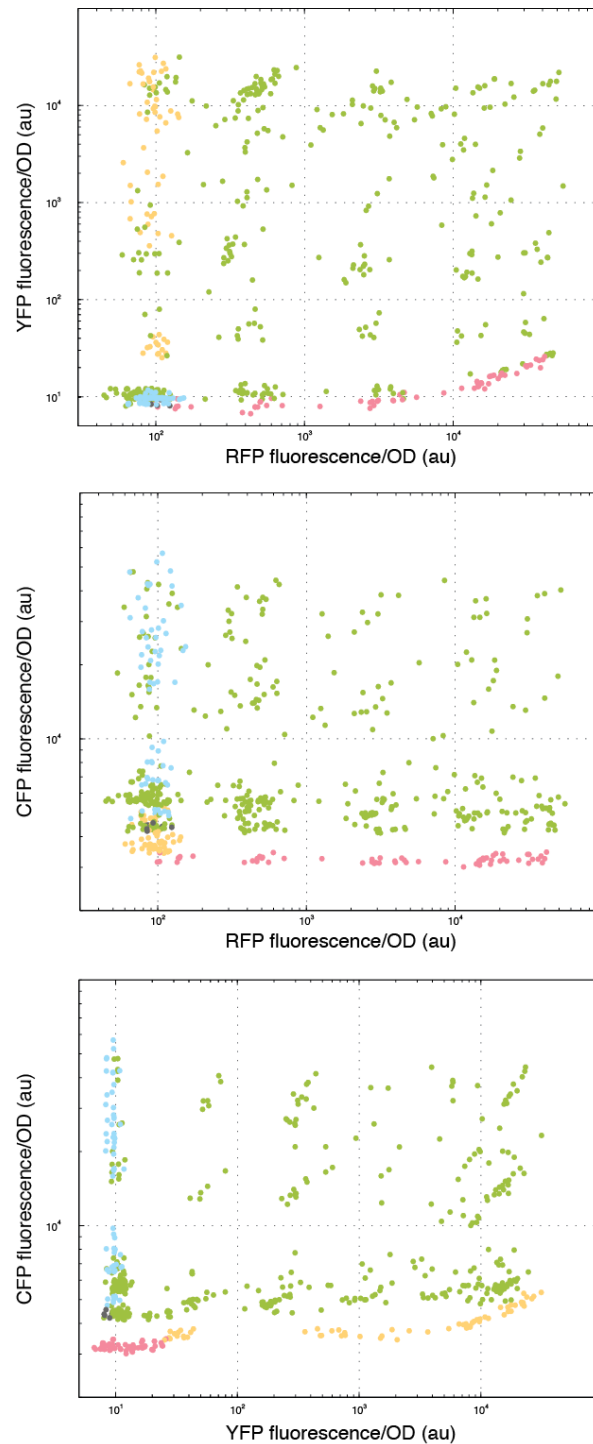

**Supplementary Figure S5. Combinatorial assembly of a fluorescent protein library.**

Two-dimensional projections of the data shown in **Figure 1D**. RFP-only library (red dots, LEU2), YFP-only library (yellow dots, HIS3), CFP-only library (blue dots, URA3), triple FP library (green dots, MET15), empty vector (black dots, MET15). *N.b.*, the individual libraries and triple library are expressed from plasmids carrying different auxotrophic markers, which may contribute to the lower baseline CFP fluorescence observed for the RFP and YFP libraries.

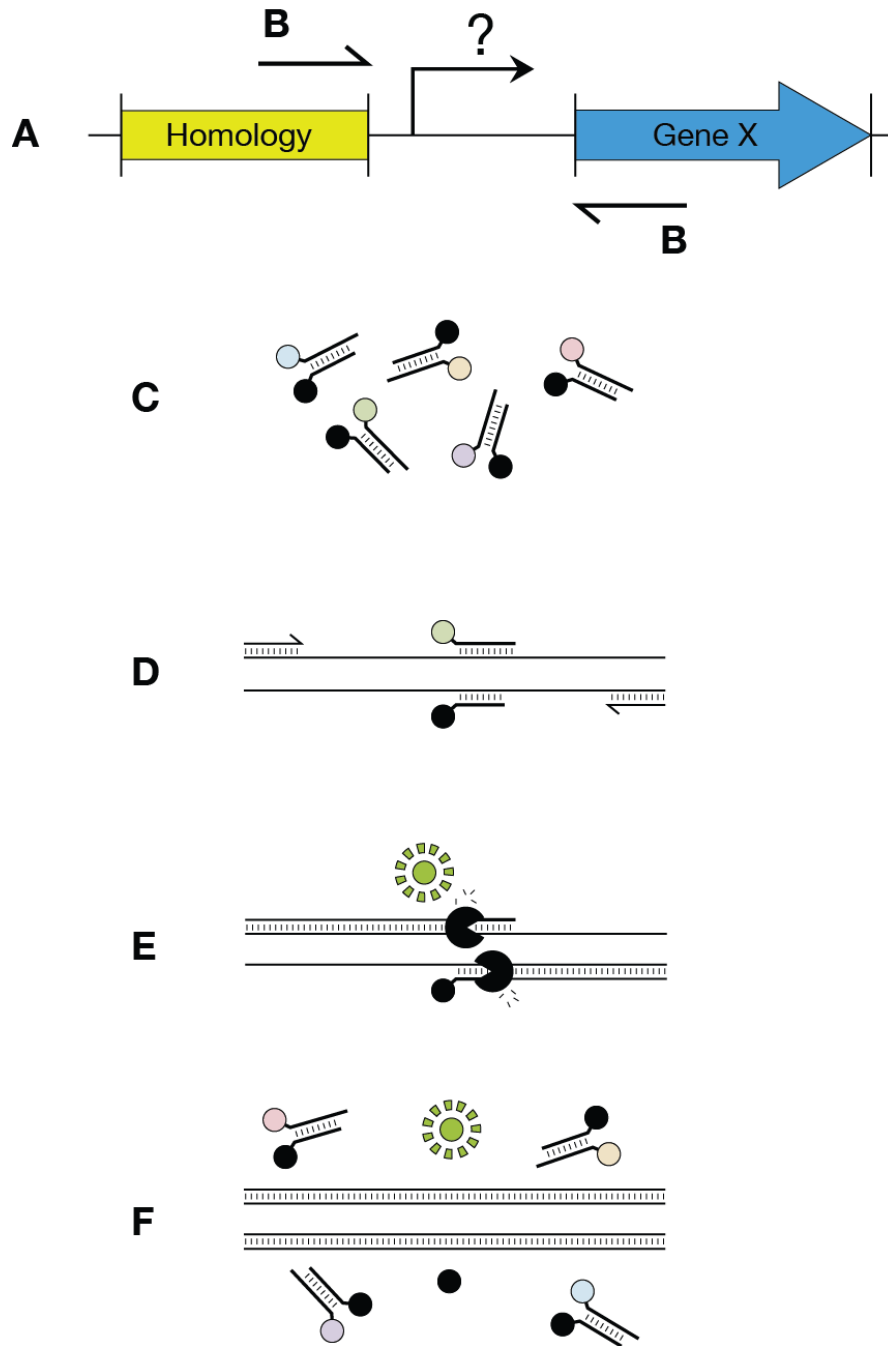

**Supplementary Figure S6. TaqMan Rapid Analysis of Combinatorial assemblies.**

Schematic for how TRAC can detect the genotype of an unknown promoter in a single PCR reaction and fluorescent measurement. **A.** A template (colony) with an unknown promoter at position X. **B.** Gene-specific primers amplify the promoter region. **C.** Duplex probes are included in the amplification reaction. **D.** Specific probes anneal to the amplified DNA. **E.** 5'-3' exonuclease activity of Taq DNA polymerase cleaves annealed probes. **F.** Only the single probe specific for the promoter is released, resulting in a single fluorescent signal.

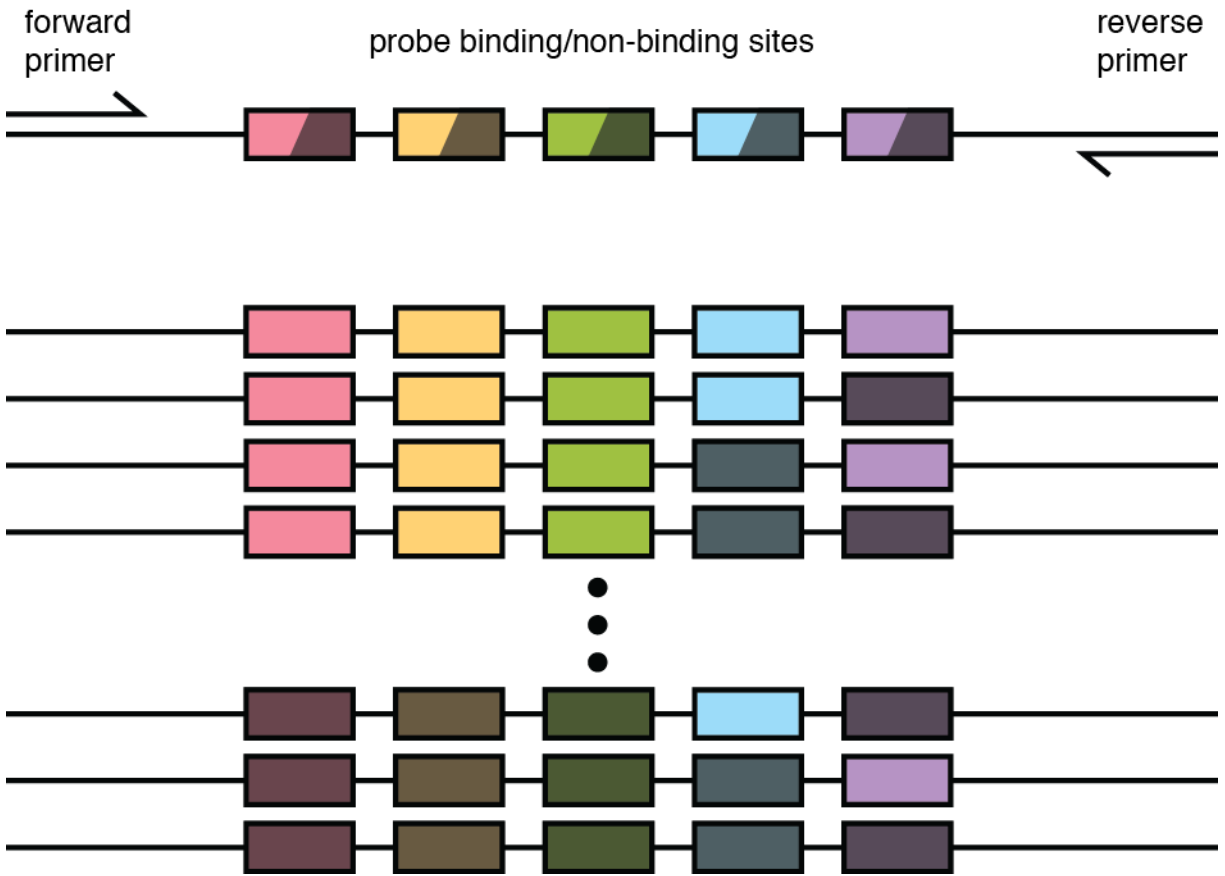

**Supplementary Figure S7. "TRAC barcode" design.** Barcodes were cloned to include either a complementary or non-complementary sequence for all five TRAC probes ( $2^5 = 32$  possible sequences) and flanking PCR primer binding sites. When a TRAC reaction was performed, combinations of zero to five fluorescent dyes were cleaved depending on whether the complementary sequence for a particular probe was present in the template. Fluorescence was measured on a plate reader as per a typical TRAC reaction, and all thirty-two unique barcodes were successfully identified.



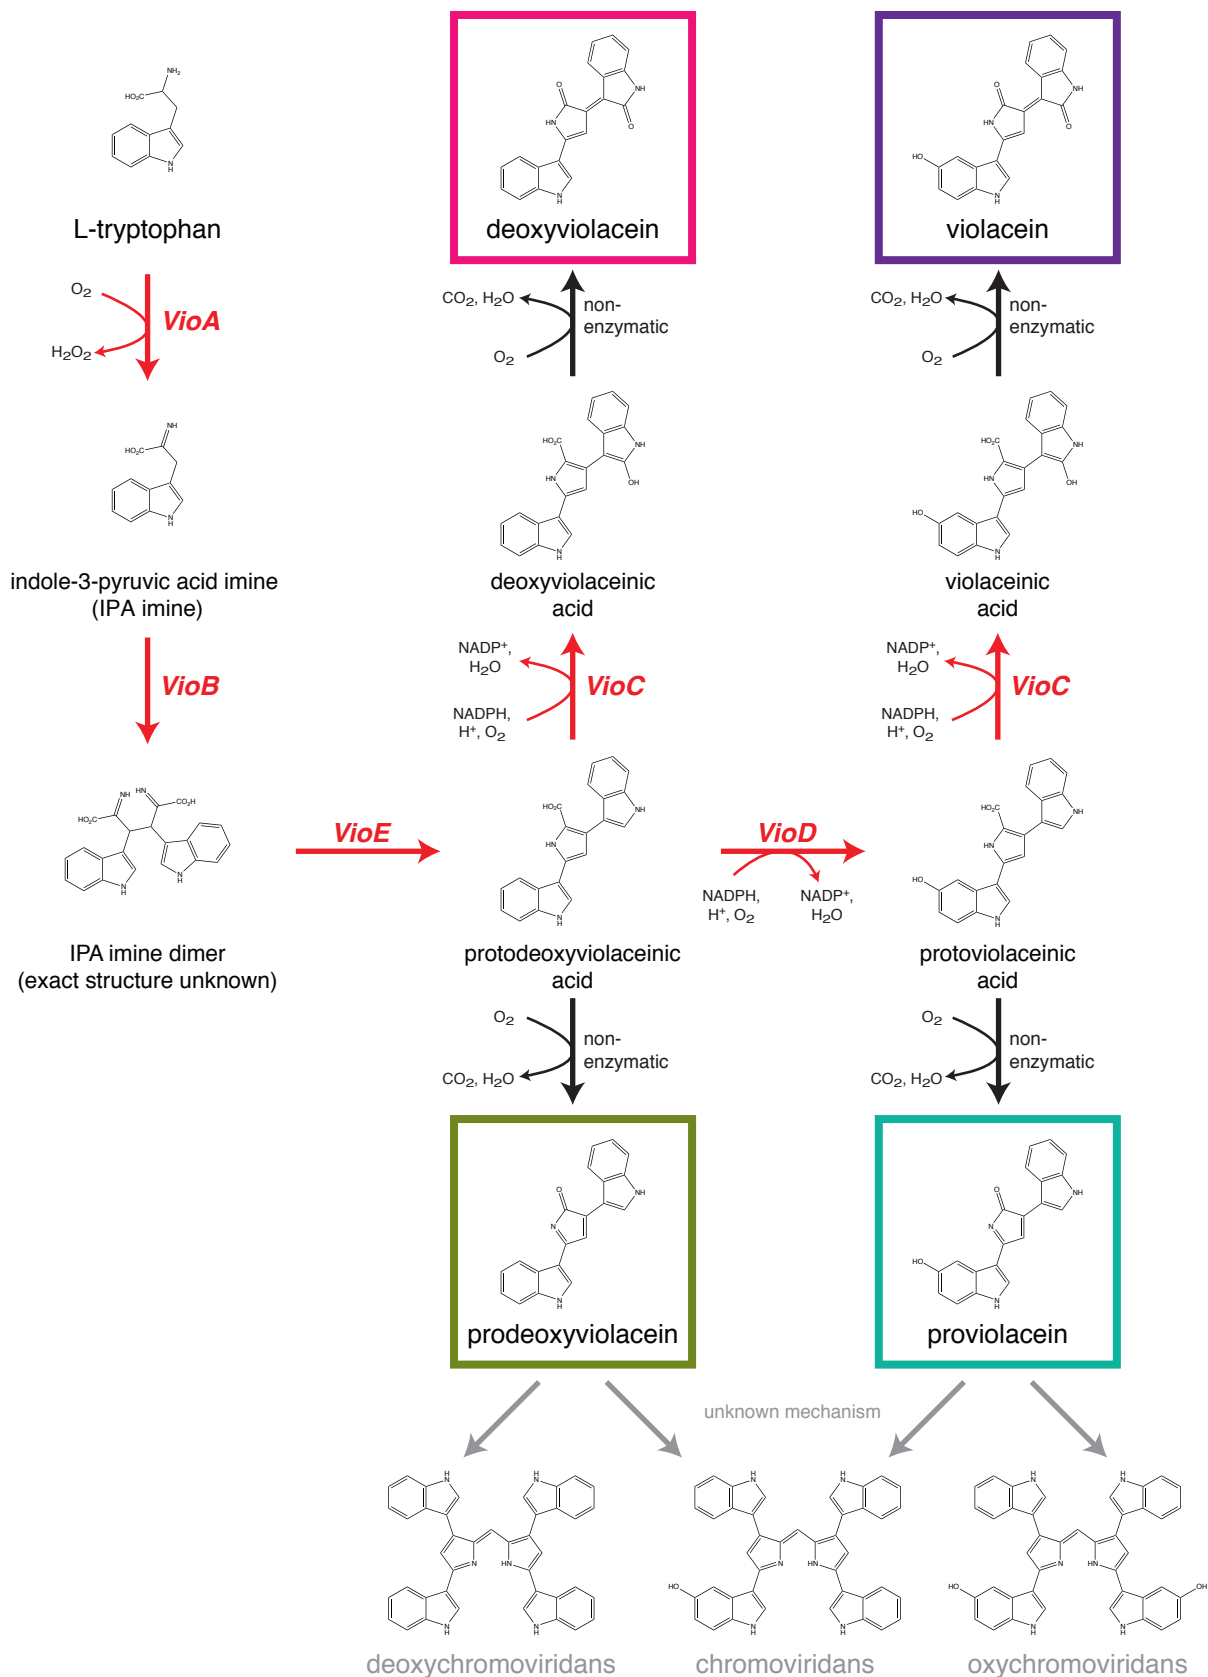

Supplementary Figure S8. Chemical structures of the violacein biosynthetic pathway.

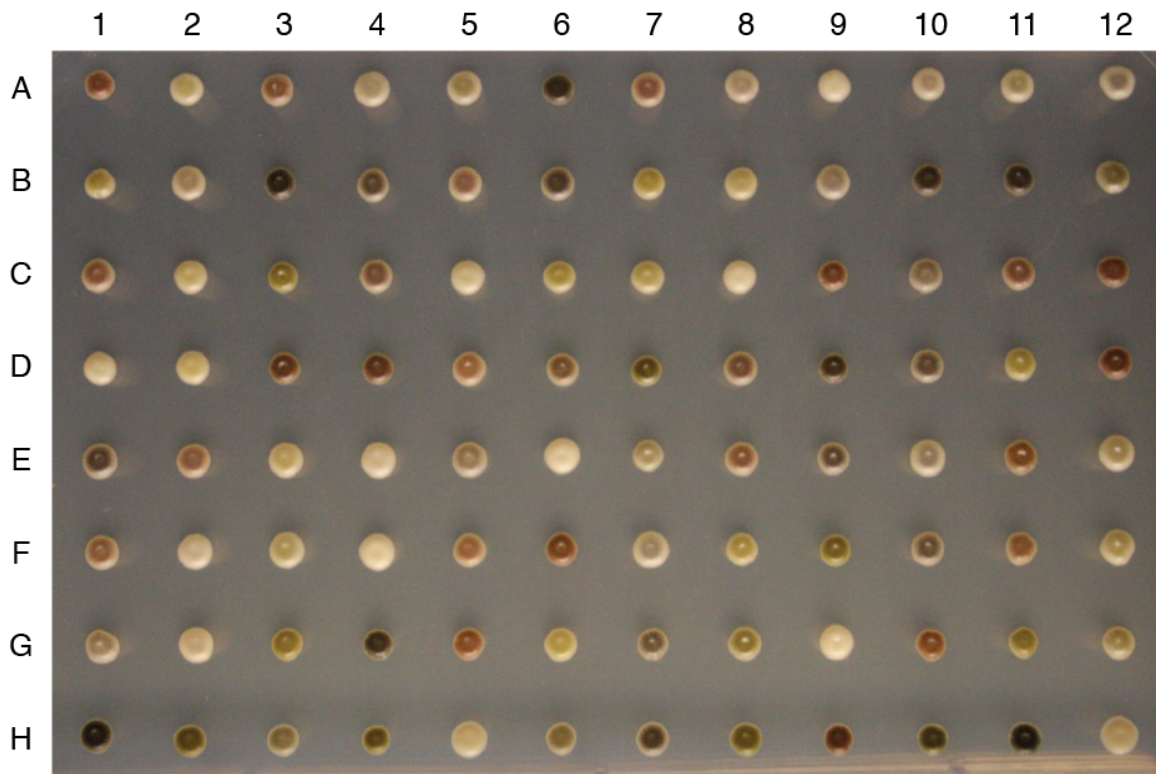

**Supplementary Figure S9. Violacein biosynthesis expression library.** Ninety-six unique clones from a combinatorial expression library of the violacein biosynthetic pathway. The first ninety-one (A01-H07) were used as training data for the regression model. The last five are controls containing *pTDH3* driving: *vioABE* (H08), *vioABEC* (H09), *vioABED* (H10), *vioABEDC* (H11), empty vectors (H12).

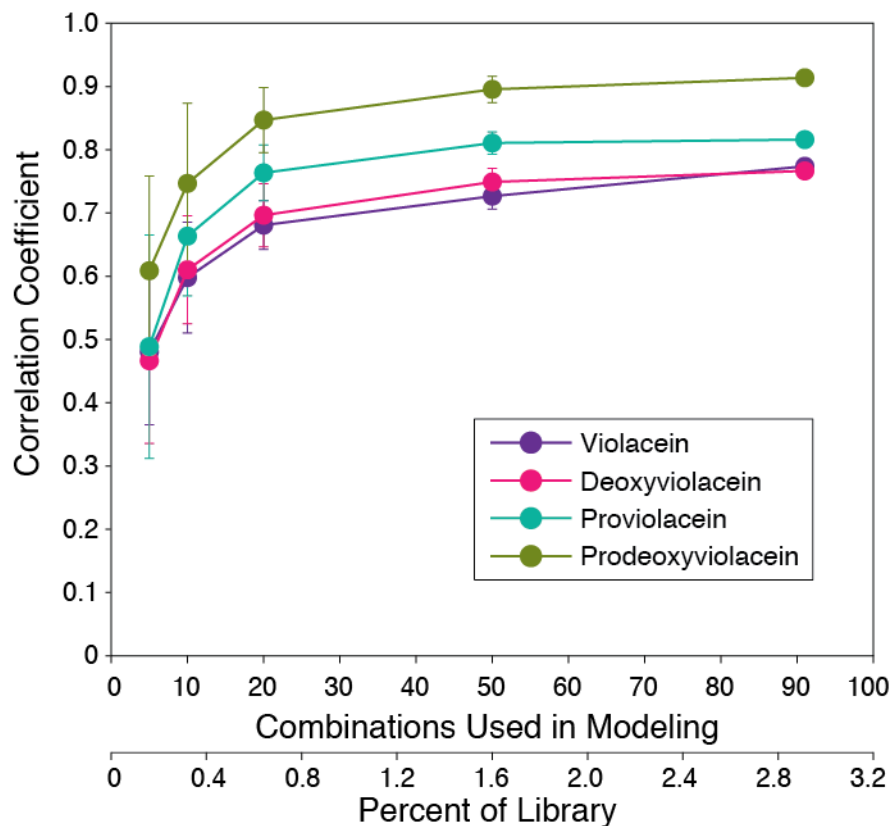

**Supplementary Figure S10. Effect of training set size on model accuracy.** The original training set included ninety-one combinations; random subsets (of size five, ten, twenty, fifty, and the full ninety-one) were used to retrain the model, and the mean correlation coefficient of one hundred trials is shown. Larger training sets improve correlation, although the marginal benefit decreases as the number of samples increases. Error bars indicate s.d.,  $n=100$ .
